# Supplementary material for: CRISPR and compound screens in a novel ex vivo tissue model identify DDR1 and ETA as regulators of cancer cell invasion
Source: Cell Mol Biol Lett. 2026 May 6;31:84. doi: 10.1186/s11658-026-00936-6 (PMC13277066; doi:10.1186/s11658-026-00936-6)
Supplement: Supplementary file 9 — Additional file 9: ST1. Table showing which candidate was identified in which well in the first and second EXTIM seeding. Red font indicates that no transmigration was observed in the second seeding. [file 11658_2026_936_MOESM10_ESM.xlsx]

## Sheet: Tabelle2
Well No.	First day of transmigration	Number of clones	First day of transmigration	Number of clones	Candidates
	1st seeding	1st seeding	2nd seeding	2nd seeding
W1	32	4	24	11	•STEAP3
					•hsa-mir-1231
					•hsa-mir-6795
W2	30	2	24	3	•NSMF
					•RFPL2
					•FAM192A
					•hsa-mir-606
W3	38	8	-	-	•
W4	36	3	32	11	•ATP1B2
					•STK19
					•CALCRL
					•EMP2
					•hsa-mir-1226
W5	34	7	28	7	•CCNL2
					•DDR1
					•FMOD
					•RFPL2
					•hsa-mir-7973-1
W6	34	6	30	4	•AZGP1
					•CASP10(1)
					•IL11
					•LAT
					•PARS2
					•TCP10L
					•FERMT1
W7	40	4	-	-	•
W8	32	5	26	3	•ABCA3
					•PHYHIP
					•TMEM18
					•TPSG1
					•hsa-mir-371a
W9	40	10	-	-	•
W10	34	3	28	10	•MYT1
					•SLC46A2
					•TPBG
					•KIFC2
					•PSENEN
					•BICD1
W11	40	13	-	-
