# Supplementary material for: CRISPR and compound screens in a novel ex vivo tissue model identify DDR1 and ETA as regulators of cancer cell invasion
Source: Cell Mol Biol Lett. 2026 May 6;31:84. doi: 10.1186/s11658-026-00936-6 (PMC13277066; doi:10.1186/s11658-026-00936-6)
Supplement: Supplementary file 11 — Additional file 11: ST3. Gene Ontology (GO-BP) enrichment analysis was performed via the Enrichr tool [63] (https://maayanlab.cloud/Enrichr/). [file 11658_2026_936_MOESM12_ESM.xlsx]

## Sheet: GO-PB
Term	P-value	Adjusted P-value	Genes
Cell-Matrix Adhesion (GO:0007160)	0.000467099	0.0938763	DDR1	FERMT1	EMP2
Muscle Cell Migration (GO:0014812)	0.012532	0.0938763	DDR1
Smooth Muscle Cell Migration (GO:0014909)	0.00837161	0.0938763	DDR1
Wound Healing, Spreading Of Cells (GO:0044319)	0.0344384	0.102598	DDR1
Epiboly Involved In Wound Healing (GO:0090505)	0.0208025	0.0944367	DDR1
Collagen-Activated Signaling Pathway (GO:0038065)	0.0111471	0.0938763	DDR1
Positive Regulation Of Intracellular Signal Transduction (GO:1902533)	0.00582869	0.0938763	DDR1	IL11	CASP10	RFPL2
Regulation Of Kinase Activity (GO:0043549)	0.00628031	0.0938763	DDR1	EMP2
Regulation Of Microtubule-Based Process (GO:0032886)	0.00149838	0.0938763	CCNL2	BICD1
Plasma Membrane Raft Assembly (GO:0044854)	0.00698104	0.0938763	EMP2
Plasma Membrane Raft Organization (GO:0044857)	0.00698104	0.0938763	EMP2
Renal System Process Involved In Regulation Of Blood Volume (GO:0001977)	0.00698104	0.0938763	EMP2
Response To Gonadotropin (GO:0034698)	0.00698104	0.0938763	NSMF
Cellular Response To Gonadotropin Stimulus (GO:0071371)	0.00837161	0.0938763	NSMF
Positive Regulation Of Protein Localization To Centrosome (GO:1904781)	0.00837161	0.0938763	BICD1
Copper Ion Import (GO:0015677)	0.00837161	0.0938763	STEAP3
Keratinocyte Proliferation (GO:0043616)	0.00837161	0.0938763	FERMT1
Bleb Assembly (GO:0032060)	0.00837161	0.0938763	EMP2
Calcitonin Family Receptor Signaling Pathway (GO:0097646)	0.00837161	0.0938763	CALCRL
Notch Receptor Processing (GO:0007220)	0.00976029	0.0938763	PSENEN
Negative Regulation Of Phospholipase Activity (GO:0010519)	0.00976029	0.0938763	BICD1
Regulation Of Wound Healing, Spreading Of Epidermal Cells (GO:1903689)	0.00976029	0.0938763	FERMT1
Positive Regulation Of Cardiac Epithelial To Mesenchymal Transition (GO:0062043)	0.00976029	0.0938763	EMP2
T Cell Mediated Cytotoxicity (GO:0001913)	0.0111471	0.0938763	EMP2
Amyloid-Beta Formation (GO:0034205)	0.0111471	0.0938763	PSENEN
Regulation Of Cell Killing (GO:0031341)	0.0111471	0.0938763	IL11
Protein Maturation (GO:0051604)	0.0116135	0.0938763	PSENEN	CASP10
Regulation Of Protein Localization To Centrosome (GO:1904779)	0.012532	0.0938763	BICD1
Regulation Of Complement-Dependent Cytotoxicity (GO:1903659)	0.012532	0.0938763	IL11
Negative Regulation Of Hormone Secretion (GO:0046888)	0.012532	0.0938763	IL11
Microtubule Anchoring (GO:0034453)	0.012532	0.0938763	BICD1
Transferrin Transport (GO:0033572)	0.012532	0.0938763	STEAP3
Granulocyte Migration (GO:0097530)	0.012532	0.0938763	EMP2
Actin-Mediated Cell Contraction (GO:0070252)	0.012532	0.0938763	EMP2
Positive Regulation Of Sodium Ion Transmembrane Transport (GO:1902307)	0.012532	0.0938763	ATP1B1
Protein Localization (GO:0008104)	0.012687	0.0938763	EMP2	BICD1	PHYHIP
Regulation Of Anatomical Structure Morphogenesis (GO:0022603)	0.0135757	0.0938763	EMP2	NSMF
Cardiac Muscle Cell Membrane Repolarization (GO:0099622)	0.0139151	0.0938763	ATP1B1
Positive Regulation Of Integrin Activation (GO:0033625)	0.0139151	0.0938763	FERMT1
Copper Ion Transport (GO:0006825)	0.0139151	0.0938763	STEAP3
Positive Regulation Of Lipid Transport (GO:0032370)	0.0152963	0.0938763	ABCA3
Regulation Of Phospholipase C Activity (GO:1900274)	0.0152963	0.0938763	BICD1
Protein Localization To Plasma Membrane (GO:0072659)	0.0156717	0.0938763	EMP2	ATP1B1
Positive Regulation Of Integrin-Mediated Signaling Pathway (GO:2001046)	0.0166757	0.0938763	EMP2
Microtubule Anchoring At Microtubule Organizing Center (GO:0072393)	0.0166757	0.0938763	BICD1
Positive Regulation Of Neuron Migration (GO:2001224)	0.0166757	0.0938763	NSMF
Relaxation Of Cardiac Muscle (GO:0055119)	0.0166757	0.0938763	ATP1B1
Positive Regulation Of Sodium Ion Transmembrane Transporter Activity (GO:2000651)	0.0166757	0.0938763	ATP1B1
Sodium Ion Export Across Plasma Membrane (GO:0036376)	0.0166757	0.0938763	ATP1B1
Protein Localization To Cell Periphery (GO:1990778)	0.0167687	0.0938763	EMP2	ATP1B1
Peptidyl-Tyrosine Autophosphorylation (GO:0038083)	0.0180531	0.0938763	DDR1
Membrane Protein Intracellular Domain Proteolysis (GO:0031293)	0.0180531	0.0938763	PSENEN
Regulation Of Vasculogenesis (GO:2001212)	0.0180531	0.0938763	EMP2
Relaxation Of Muscle (GO:0090075)	0.0180531	0.0938763	ATP1B1
Positive Regulation Of Potassium Ion Transmembrane Transporter Activity (GO:1901018)	0.0180531	0.0938763	ATP1B1
Amyloid Precursor Protein Catabolic Process (GO:0042987)	0.0180531	0.0938763	PSENEN
Intracellular Potassium Ion Homeostasis (GO:0030007)	0.0180531	0.0938763	ATP1B1
Membrane Raft Organization (GO:0031579)	0.0194287	0.09418	EMP2
Membrane Repolarization During Cardiac Muscle Cell Action Potential (GO:0086013)	0.0194287	0.09418	ATP1B1
Regulation Of Extracellular Matrix Disassembly (GO:0010715)	0.0194287	0.09418	DDR1
Regulation Of Integrin Activation (GO:0033623)	0.0194287	0.09418	FERMT1
Membrane Repolarization During Action Potential (GO:0086011)	0.0208025	0.0944367	ATP1B1
Regulation Of Hormone Secretion (GO:0046883)	0.0208025	0.0944367	IL11
Amyloid-Beta Metabolic Process (GO:0050435)	0.0208025	0.0944367	PSENEN
Cell Communication By Electrical Coupling Involved In Cardiac Conduction (GO:0086064)	0.0221744	0.0990252	ATP1B1
Megakaryocyte Differentiation (GO:0030219)	0.0235444	0.0990252	IL11
Positive Regulation Of Potassium Ion Transmembrane Transport (GO:1901381)	0.0235444	0.0990252	ATP1B1
Amyloid Precursor Protein Metabolic Process (GO:0042982)	0.0235444	0.0990252	PSENEN
Positive Regulation Of Small GTPase Mediated Signal Transduction (GO:0051057)	0.0235444	0.0990252	STK19
Positive Regulation Of I-kappaB kinase/NF-kappaB Signaling (GO:0043123)	0.0247911	0.100352	CASP10	RFPL2
Membrane Repolarization (GO:0086009)	0.0249126	0.100352	ATP1B1
Intracellular Sodium Ion Homeostasis (GO:0006883)	0.0249126	0.100352	ATP1B1
Establishment Of Epithelial Cell Polarity (GO:0090162)	0.026279	0.102598	FERMT1
Regulation Of Integrin-Mediated Signaling Pathway (GO:2001044)	0.026279	0.102598	EMP2
T Cell Mediated Immunity (GO:0002456)	0.0276435	0.102598	EMP2
Regulation Of Cardiac Muscle Contraction By Calcium Ion Signaling (GO:0010882)	0.0276435	0.102598	ATP1B1
Macrophage Differentiation (GO:0030225)	0.0290061	0.102598	CASP10
Regulation Of Transferase Activity (GO:0051338)	0.0290061	0.102598	EMP2
Modulation By Symbiont Of Entry Into Host (GO:0052372)	0.0290061	0.102598	RFPL2
Protein Localization To Membrane (GO:0072657)	0.0294258	0.102598	EMP2	ATP1B1
Membrane Protein Ectodomain Proteolysis (GO:0006509)	0.030367	0.102598	PSENEN
Negative Regulation Of G Protein-Coupled Receptor Signaling Pathway (GO:0045744)	0.030367	0.102598	BICD1
Positive Regulation Of Cholesterol Efflux (GO:0010875)	0.030367	0.102598	ABCA3
Negative Regulation Of Cell Communication (GO:0010648)	0.030367	0.102598	IL11
Blood Vessel Endothelial Cell Migration (GO:0043534)	0.030367	0.102598	EMP2
Regulation Of Centrosome Cycle (GO:0046605)	0.0317259	0.102598	CCNL2
Regulation Of Extracellular Matrix Organization (GO:1903053)	0.0317259	0.102598	DDR1
Potassium Ion Homeostasis (GO:0055075)	0.0317259	0.102598	ATP1B1
Organic Substance Transport (GO:0071702)	0.0320095	0.102598	CALCRL	ABCA3
Stress Granule Assembly (GO:0034063)	0.0330831	0.102598	BICD1
Regulation Of Viral Life Cycle (GO:1903900)	0.0330831	0.102598	RFPL2
Iron Ion Transport (GO:0006826)	0.0330831	0.102598	STEAP3
Early Endosome To Late Endosome Transport (GO:0045022)	0.0330831	0.102598	EMP2
Positive Regulation Of Peptidase Activity (GO:0010952)	0.0344384	0.102598	PSENEN
Vesicle-Mediated Transport Between Endosomal Compartments (GO:0098927)	0.0344384	0.102598	EMP2
Sodium Ion Homeostasis (GO:0055078)	0.0344384	0.102598	ATP1B1
Regulation Of Potassium Ion Transmembrane Transporter Activity (GO:1901016)	0.0357919	0.103399	ATP1B1
Negative Regulation Of Endothelial Cell Apoptotic Process (GO:2000352)	0.0357919	0.103399	IL11
Protein Localization To Cell Surface (GO:0034394)	0.0357919	0.103399	EMP2
Cellular Response To Acid Chemical (GO:0071229)	0.0371435	0.105179	NSMF
Positive Regulation Of Calcium Ion Transmembrane Transporter Activity (GO:1901021)	0.0371435	0.105179	ATP1B1
Negative Regulation Of Signaling (GO:0023057)	0.0384933	0.10708	IL11
Cardiac Muscle Cell Action Potential (GO:0086001)	0.0398413	0.10708	ATP1B1
Regulation Of Neuron Migration (GO:2001222)	0.0398413	0.10708	NSMF
Positive Regulation Of Dephosphorylation (GO:0035306)	0.0398413	0.10708	NSMF
Positive Regulation Of Endopeptidase Activity (GO:0010950)	0.0398413	0.10708	PSENEN
Apoptotic Process (GO:0006915)	0.0402724	0.10708	CASP10	EMP2
Extrinsic Apoptotic Signaling Pathway Via Death Domain Receptors (GO:0008625)	0.0411875	0.10708	CASP10
Regulation Of Vasculature Development (GO:1901342)	0.0411875	0.10708	EMP2
Response To Amino Acid (GO:0043200)	0.0411875	0.10708	NSMF
Regulation Of I-kappaB kinase/NF-kappaB Signaling (GO:0043122)	0.0415591	0.10708	CASP10	RFPL2
Regulation Of Dendrite Morphogenesis (GO:0048814)	0.0425318	0.107647	NSMF
Positive Regulation Of Cholesterol Transport (GO:0032376)	0.0425318	0.107647	ABCA3
Regulation Of Cholesterol Efflux (GO:0010874)	0.0438744	0.109114	ABCA3
Purine Ribonucleoside Triphosphate Metabolic Process (GO:0009205)	0.0438744	0.109114	ATP1B1
Cardiac Muscle Contraction (GO:0060048)	0.0452151	0.109589	ATP1B1
Positive Regulation Of Ion Transmembrane Transporter Activity (GO:0032414)	0.0452151	0.109589	ATP1B1
Positive Regulation Of Protein Dephosphorylation (GO:0035307)	0.0452151	0.109589	NSMF
ATP Metabolic Process (GO:0046034)	0.046554	0.110037	ATP1B1
Membrane Protein Proteolysis (GO:0033619)	0.046554	0.110037	PSENEN
Regulation Of Neuronal Synaptic Plasticity (GO:0048168)	0.046554	0.110037	NSMF
tRNA Aminoacylation For Protein Translation (GO:0006418)	0.0478911	0.110458	PARS2
Cellular Response To Amino Acid Stimulus (GO:0071230)	0.0478911	0.110458	NSMF
Regulation Of Cardiac Muscle Contraction (GO:0055117)	0.0478911	0.110458	ATP1B1
