# Supplementary material for: CRISPR and compound screens in a novel ex vivo tissue model identify DDR1 and ETA as regulators of cancer cell invasion
Source: Cell Mol Biol Lett. 2026 May 6;31:84. doi: 10.1186/s11658-026-00936-6 (PMC13277066; doi:10.1186/s11658-026-00936-6)
Supplement: Supplementary file 13 — Additional file 13: ST5. List of sequences for cloning primers, for PCR, and for gRNAs. [file 11658_2026_936_MOESM14_ESM.xlsx]

## Sheet: Sheet1
ST5_all primer + shRNA + gRNA sequences
Cloning primers
Target gene	Direction	Sequence 5’ - 3’
Cloning of GJB3 in pBABE-Bla	Forward	TCAGCTGAATTCTCATCGCCATGGACTGGAAGACAC
	Reverse	TCAGCTGTCGACCCTCTGTGGTCAGATGGGGGTCAGG
Primers for qPCR
Target gene	Direction	Sequence 5’ - 3’
GAPDH qPCR	Forward	AAGGTCATCCCTGAGCTGAAC
	Reverse	ACGCCTGCTTCACCACCTTCT
DDR1 qPCR	Forward	CCCCAATGGCTCTGCCTA
	Reverse	AACAATGTCAGCCTCGGCATA
AZGP1 qPCR	Forward	AGGACAGCCAACTTCAGAAGGC
	Reverse	CGATCTCACAACCAAACCTTCCC
LAT qPCR	Forward	ATCCTGGAGCGGCTAAGACTGA
	Reverse	GTTCAGCTCCTGCAGATTCTCG
STEAP3 qPCR	Forward	TGCAAACTCGCTCAACTGGAGG
	Reverse	AGGCAGGTAGAACTTGTAGCGG
STK19 qPCR	Forward	GGGACCTTAGTTTCCAGCAGGA
	Reverse	ACGGTGAGGACTCCAGCATTCA
Primers for standard PCR
Target gene	Direction	Sequence 5’ - 3’
GAPDH	Forward	AAGGTCATCCCTGAGCTGAAC
	Reverse	ACGCCTGCTTCACCACCTTCT
DDR1	Forward	GGCCAAACCCACCAACAC
	Reverse	TCCTGGCATTCTTGGTGGCA
DDR2	Forward	AACGAGAGTGCCACCAATGGCT
	Reverse	AGCAAGGTCCTAGAGAGCCA
EDNRA	Forward	GATAGCCAGTCTTGCCCTTG
EDNRA	Reverse	ATTGTGATCAAAAGGCCAGC
EDNRB	Forward	GGTTGTGTCCTGCCTTGTGTT
EDNRB	Reverse	TTCGCATGCACTTGTTCTTGT
Primers for gRNA amplification PCR from genomic DNA
	Direction	Sequence 5’ - 3’
GeCKO v2 library gRNA	Forward	AATGGACTATCATATGCTTACCGTAACTTGAAAGTATTTCG
	Reverse	TCTACTATTCTTTCCCCTGCACTGTTGTGGGCGATGTGCGCTCTG
Primers for Sanger Sequencing
Target gene	Direction	Sequence 5’ - 3’
GeCKO v2 Screening	Forward	CTGGCCGTCGTTTTAC
	Reverse	GTCCTTTGTCGATACTG
lentiCRISPRv2	Forward	GAGGGCCTATTTCCCATG
	Reverse	TTCTTGATGCTGTGCCGGTC
Sequences of the shRNAs and the gRNAs used in this study
Plasmid	Selection marker	Target Sequence	Other
pGIPZ shScramble	Puromycin	CCCGCCTGAAGTCTCTGATTAA	GFP
pGIPZ shGJB3#1	Puromycin	ACCACTCTGAGTTCACTAAGTT	GFP
pGIPZ shGJB3#2	Puromycin	AAAACAAGCGAATTAACTATCT	GFP
pGIPZ shORP3#1	Puromycin	CGGCACAAACCTGTGTTTATA	GFP
pGIPZ shORP3#2	Puromycin	CTCCGGTTCTTGGAGAAACATA	GFP
lentiCRISPRv2-gGFP#1	Puromycin	CAGGGTCAGCTTGCCGTAGG	None
lentiCRISPRv2-gGFP#2	Puromycin	CGTGCTGCTTCATGTGGTCG	None
lentiCRISPRv2-gDDR1#1	Puromycin	GCTACCGGCTGCGTTACTCC	None
lentiCRISPRv2-gDDR1#2	Puromycin	TGGTCCGGTCCTGCATGCCC	None
