# Supplementary material for: CRISPR and compound screens in a novel ex vivo tissue model identify DDR1 and ETA as regulators of cancer cell invasion
Source: Cell Mol Biol Lett. 2026 May 6;31:84. doi: 10.1186/s11658-026-00936-6 (PMC13277066; doi:10.1186/s11658-026-00936-6)
Supplement: Supplementary file 14 — Additional file 14: ST6. List of chemicals used for screening of compounds with detailed information. [file 11658_2026_936_MOESM15_ESM.xlsx]

## Sheet: Pfizer Plate actable
ROW	COLUMN	ITEM	COMPOUND	MOL WT STRUCT	SECNAME	DESCRIPTION	CLASS	TARGET	ACTION	SELECTIVITY	CAS
A	1	PZ0001	Atorvastatin calcium salt trihydrate	604.69	(bR,dR)-2-(4-fluorophenyl)-.beta.,.delta.-dihydroxy-5-(1-methylethyl)-3-phenyl-4-[(phenylamino)carbonyl]-1H-pyrrole-1-heptanoic acid	HMG-CoA reductase inhibitor, blocks conversion of HMG-CoA to mevalonate, an early step in cholesterol biosynthesis.	Lipid Signaling	Enzyme	Inhibitor	HMG-CoA reductase	134523-03-8
B	1	PZ0014	Linezolid	337.35	N-[[(5S)-3-[3-Fluoro-4-(4-morpholinyl)phenyl]-2-oxo-5-oxazolidinyl]methyl]acetamide; PNU-100766; U-100766	Inhibits bacterial mRNA translation, nonselective inhibitor of monoamine oxidase.	Antibiotic	Enzyme	Inhibitor		165800-03-3
C	1	PZ0107	CP-101537	198.26	N-(1a,5a,6a)-3-Azabicyclo[3.1.0]hex-6-yl-carbamic acid 1,1-dimethylethyl ester; MN-2633; PF-3339644	Non selective matrix metalloproteinase (MMP) inhibitor.	Metalloproteinase	Enzyme	Inhibitor	MMP	134575-17-0
D	1	PZ0121	CP-135807	351.4	3-(N-Methylpyrrolidin-2R-ylmethyl)-5-(3-nitropyrid-2- yl)amino-1H-indole 3-[[(2R)-1-Methyl-2-pyrrolidinyl]methyl]-N-(3-nitro-2-p yridinyl)-1H-indol-5-amine	Selective 5-HT1D serotonin receptor agonist.	Neurotransmitter	Receptor	Agonist	5-HT1D	151272-90-1
E	1	PZ0138	SC-51089 hydrate	459.33	8-Chloro-dibenz[b,f][1,4]oxazepine-10(11H)-carboxylic acid 2-[1-oxo-3-(4-pyridinyl)propyl]hydrazide	Selective EP1 prostanoid receptor antagonist.	Lipid Signaling	Receptor	Antagonist	EP1	146033-02-5
F	1	PZ0151	PF-956980	342.44	{(3R,4R)-4-Methyl-3-[methyl-(7H-pyrrolo[2,3-d]pyrimidin-4-yl)-amino]-piperidin-1-yl}-pyrrolidin-1-yl-methanone	FGF1 receptor antagonist; PDGF receptor modulator; Flt3 tyrosine kinase modulator; and VEGF antagonist.	Growth Factor	Receptor	Antagonist	FGFR1	384335-57-3
G	1	PZ0174	Sonepiprazole	401.52	4-[4-[2-[(1S)-Isochroman-1-yl]ethyl]piperazin-1-yl]benzenesulfonamide; U-101387; PNU-101387	Selective D4 dopamine antagonist.	Neurotransmitter	Receptor	Antagonist	D4	170858-33-0
H	1	PZ0187	GSI-953	391.74	5-Chloro-N-[(1S)-3,3,3-trifluoro-1-(hydroxymethyl)-2-(trifluoromethyl)propyl] thiophene-2-sulfonamide; Begacestat	ß-secretase inhibitor that selectively inhibits cleavage of amyloid precursor protein (APP) over Notch.	Neurobiology	Enzyme	Inhibitor	ß-secretase	769169-27-9
A	2	PZ0002	Maraviroc	513.67	4,4-Difluoro-N-[(1S)-3-[(3-exo)-3-[3-methyl-5-(1-methylethyl)-4H-1,2,4-triazol-4-yl]-8-azabicyclo[3.2.1]oct-8-yl]-1-phenylpropyl]cyclohexanecarboxamide; UK-427857	CCR5 chemokine receptor antagonist, inhibits HIV entry by blocking receptor interaction with viral coat protein gp120.	Chemokine	Receptor	Antagonist	CCR-5	376348-65-1
B	2	PZ0015	Trovafloxacin	512.46	(1a,5a,6a)-7-(6-Amino-3-azabicyclo[3.1.0]hex-3-yl)-1-(2,4-difluorophenyl)-6-fluoro-1,4-dihydro-4-oxo-1,8-naphthyridine-3-carboxylic acid; Trovafloxacin; CP-99219-27	Broad spectrum antibiotic. Inhibits bacterial DNA gyrase and topoisomerase IV.	Antibiotic	Enzyme	Inhibitor		147059-75-4
C	2	PZ0108	CP-335963	312.75	4-Chloro-6,7-bis(2-methoxyethoxy)-quinazoline; PF-508367	Aurora 2 kinase inhibitor, PDGF inhibitor, and anti-proliferative.	Ser/Thr Kinase	Enzyme	Inhibitor	Aurora-2	183322-18-1
D	2	PZ0123	Avridine	667.19	N,N-Dioctadecyl-N',N'-bis(2-hydroxyethyl)-1,3-diaminopropane; CP 20961; N,N-Dioctadecyl-N',N'-bis(2-hydroxyethyl)propanediamine	Broad spectrum adjuvant that induces interferon expression, induces T and B cell proliferation and activates macrophages.	Immunomodulator		Adjuvant		35607-20-6
E	2	PZ0139	SC-58125	384.35	5-(4-Fluorophenyl)-1-[4-(methylsulfonyl)phenyl]-3-(trifluoromethyl)pyrazole	Selective cyclooxygenase 2 (COX-2) inhibitor.	Lipid Signaling	Enzyme	Inhibitor	COX2	162054-19-5
F	2	PZ0152	UK-356618	557.72	(2R)-N1-[(1S)-2,2-Dimethyl-1-({[(1R)-1-phenylethyl]amino}carbonyl)propyl]-2-{3-[(3-methyl-4-phenyl)-phenyl]propyl}-(N4-hydroxy)butanediamide; UK-356,618	Matrix metalloproteinase (MMP3; stromelysin-1) Inhibitor. 140-fold selectivity vs. MMP-1, -2, -9, and -14.	Metalloproteinase	Enzyme	Inhibitor	MMP3	230961-08-7
G	2	PZ0175	PD-149163	943.91	N2-[(2S)-2,6-Diaminohexyl]-L-lysyl-L-prolyl-L-tryptophyl-3-methyl-L-valyl-L-Leucine ethyl ester tetrahydrochloride hydrate	Neurotensin (8-13) analog; Neurotensin NTR1 receptor agonist. Brain penetrating with pro-cognitive, antipsychotic and anxiolytic effects.	Neurotransmitter	Receptor	Agonist	NTR1
H	2	PZ0189	CP-316819	415.87	5-Chloro-N-[(1S,2R)-2-hydroxy-3-(methoxymethylamino)-3-oxo-1-(phenylmethyl)propyl]-1H-indole-2-carboxamide; GPi 819	Facilitates glycogen utilization in the brain, prevents neuronal cell death.	Neurobiology	Enzyme	Inhibitor	glycogen phosphorylase	186392-43-8
A	3	PZ0003	Sildenafil	666.7	1-[[3-(4,7-Dihydro-1-methyl-7-oxo-3-propyl-1H-pyrazolo[4,3-d]pyrimidin-5-yl)-4-ethoxyphenyl]sulfonyl]-4-methylpiperazine; UK-92,480	Selective inhibitor of cGMP specific phosphodiesterase type 5 (PDE5).	Cyclic nucleotides	Enzyme	Inhibitor	PDE5	171599-83-0
B	3	PZ0016	Dofetilide	441.56	N-[4-[2-[Methyl[2-[4-[(methylsulfonyl)amino]phenoxy]ethyl]amino]ethyl]phenyl]methanesulfonamide; UK-68798	Class III antiarrhythmic and hERG channel blocker, blocks the delayed rectifier outward potassium current (IKr).	Ion Channels	Ion Channel	Inhibitor	Ikr	115256-11-6
C	3	PZ0109	PD-161570	532.51	1-tert-Butyl-3-[6-(2,6-dichlorophenyl)-2-[[4-(diethylamino)butyl]amino]pyrido[2,3-d]pyrimidin-7-yl]urea; PF-1480232	Inhibits FGF-1 receptor tyrosine kinase activity.	Tyrosine Kinase	Enzyme	Inhibitor	FGFR-1	192705-80-9
D	3	PZ0124	CP-66713	295.73	8-chloro-1-phenyl-[1,2,4]triazolo[4,3-a]quinoxalin-4-amine; PF-1716311	A2 Adenosine receptor antagonist.	Neurotransmitter	Receptor	Antagonist	ADRA2	91896-57-0
E	3	PZ0140	EBPC	261.27	2,5-Dihydro-4-hydroxy-5-oxo-1-(phenylmethyl)-1H-pyrrole-3-carboxylic acid ethyl ester; CP-10668	Aldose reductase inhibitor with anti-cancer activity.	Lipid Signaling	Enzyme	Inhibitor	Aldose Reductase	4450-98-0
F	3	PZ0155	PF-03716556	394.47	N-(2-Hydroxyethyl)-N,2-dimethyl-8-{[(4R)-5-methyl-3,4-dihydro-2H-chromen-4-yl]amino}imidazo[1,2-a]pyridine-6-carboxamide; PF-03716556	Potent, selective and reversible acid pump antagonist (H, K-ATPase).	Ion Channels	Ion Channel	Antagonist	H,K-ATPase	928774-43-0
G	3	PZ0176	SC-26196	423.55	2,2-diphenyl-5-(4-[[(1 E)-pyridin-3-yl-methylidene]amino]piperazin-1-yl)pentanenitrile	Delta6 fatty acid desaturase (Delta6D) inhibitor. Blocks conversion of linoleic acid to arachidonic acid.	Lipid Signaling	Enzyme	Inhibitor	Delta6D	218136-59-5
H	3	PZ0190	Avasimibe	501.72	[[2,4,6-tris(1-methylethyl)phenyl]acetyl]-, 2,6-bis(1-methylethyl)phenyl ester] sulfamic acid; CI-1011; PD 148515	ACAT Inhibitor, reduces triglyceride and VLDL-cholesterol levels.	Lipid Signaling	Enzyme	Inhibitor	Acyl-CoA:Cholesterol O-Acyltransferase	166518-60-1
A	4	PZ0004	Varenicline	361.35	7,8,9,10-Tetrahydro-6,10-methano-6H-pyrazino[2,3-h][3]benzazepine	Partial a4ß2 nicotinic acetylcholine receptor agonist and a7 full agonist.	Neurotransmitter	Receptor	Antagonist	nAChRa7	375815-87-5
B	4	PZ0020	Temsirolimus	1030.29	Rapamycin; CCI-779; 42-[3-Hydroxy-2-methylpropanoate	Specific inhibitor of mammalian target of rapamycin Complex 1 (mTORC1). Antiproliferative and antiangiogenic.	Gene Regulation	Receptor	Antagonist	mTOR	162635-04-3
C	4	PZ0110	SC-57461A	363.88	N-Methyl-N-[3-[4-(phenylmethyl)phenoxy]propyl ß-alanine	Inhibitor of leukotriene A4 hydrolase.	Lipid Signaling	Enzyme	Inhibitor	LTA4	423169-68-0
D	4	PZ0125	CP-53631	352.7	(1R,4S)-rel-4-(4-Bromophenyl)-1,2,3,4-tetrahydro-N-methyl-1-naphthalenamine hydrochloride	Serotonin reuptake inhibitor (SSRI); antidepressant.	Neurotransmitter	Receptor	Inhibitor	Serotonin	79836-56-9
E	4	PZ0141	PD-156707	528.48	a-[2-(4-Methoxyphenyl)-2-oxo-1-[(3,4,5-trimethoxyphenyl)methyl]ethylidene]-1,3-benzodioxole-5-acetic acid	Selective endothelin receptor (ETA) antagonist.	Neuropeptides	Receptor	Antagonist	Endothelin Receptor	162412-70-6
F	4	PZ0156	UK-383367	324.38	5-{(1R)-4-Cyclohexyl-1-[2-(hydroxyamino)-2-oxoethyl]butyl}-1,2,4-oxadiazole-3-carboxamide	Procollagen C-proteinase (PCP) inhibitor.	Protease	Enzyme	Inhibitor	PCP	348622-88-8
G	4	PZ0177	OSU6162	317.87	(S)-(-)-(3-methanesulfonyl-phenyl)-1-propyl-piperidine hydrochloride; (S,S)-3-[3-(Methylsulfonyl)phenyl]-1-propylpiperidine; PNU-96391; PNU-0096391; OSU-6162	Dopamine stabilizer, stimulates or inhibits dopaminergic signaling depending on dopaminergic tone. Low affinity ligand for D2 receptor.	Neurotransmitter	Receptor	Agonist	Dopamine	156907-84-5
H	4	PZ0191	Crizotinib	450.34	(R)-3-[1-(2,6-Dichloro-3-fluoro-phenyl)-ethoxy]-5-(1-piperidin-4-yl-1H-pyrazol-4-yl)-pyridin-2-ylamine; PF02341066; PF 2341066; Xalkori	Highly spelective, competitive inhibitor of the receptor tyrosine kinases c-Met and ALK.	Tyrosine Kinase	Enzyme	Inhibitor	c-MET / ALK	877399-52-5
A	5	PZ0005	Voriconazole	349.31	2R,3S-2-(2,4-Difluorophenyl)-3-(5-fluoropyrimidin-4-yl)-1-(1H-1,2,4-triazol-1-yl)butan-2-ol; UK-109496	Blocks ergosterol synthesis by inhibiting CYP450-dependent 14-a sterol demethylase.	Antifungal	Enzyme	Inhibitor		137234-62-9
B	5	PZ0021	Tigecycline	585.65	9-t-Butylglycylamido-minocycline; TBG-MINO; Tigecyclin	Broad spectrum glycylcycline antibiotic, inhibits protein synthesis by binding to bacterial 30S ribosomal subunit.	Antibiotic	Enzyme	Inhibitor		1229002-07-6
C	5	PZ0111	PD-407824	328.32	9-Hydroxy-4-phenylpyrrolo[3,4-c]carbazole-1,3(2H,6H)-dione	Wee1/Chk1 inhibitor.	Ser/Thr Kinase	Enzyme	Inhibitor	Wee1/Chk	622864-54-4
D	5	PZ0127	CP-74416	439.46	1-Cyclopropyl-7-(1S,4S)-2,5-diazabicyclo[2.2.1]hept-2-yl-6-fluoro-1,4-dihydro-4-oxo-3-quinolinecarboxylic acid methanesulfonate hydrate	Danofloxacin metabolite. Inhibitor of bacterial DNA gyrase.	Antibiotic	Enzyme	Inhibitor	DNA Gyrase	108461-04-7
E	5	PZ0142	PD-180970	429.27	6-(2,6-Dichlorophenyl)-2-[(4-fluoro-3-methylphenyl)amino]-8-methyl-pyrido[2,3-d]pyrimidin-7(8H)-one; PF-1515965	Potent inhibitor of the p210 Bcr-Abl tyrosine kinase.	Tyrosine Kinase	Enzyme	Inhibitor	Bcr-Abl	287204-45-9
F	5	PZ0158	PF-3845	456.46	N-3-Pyridinyl-4-[[3-[[5-(trifluoromethyl)-2-pyridinyl]oxy]phenyl]methyl]-1-piperidinecarboxamide	Irreversible fatty acid amide hydrolase (FAAH) inhibitor. Raises anandamide levels in mouse brain.	Lipid Signaling	Enzyme	Inhibitor	FAAH	1196109-52-0
G	5	PZ0178	PHA 767491	213.24	2-Pyridin-4-yl-1,5,6,7-tetrahydro-pyrrolo[3,2-c]pyridin-4-one; 1,5,6,7-Tetrahydro-2-(4-pyridinyl)-4H-pyrrolo[3,2-c]pyridin-4-one; PHA-00767491	Selective ATP-competitive dual inhibitor cdc7/cdk9. Blocks DNA helicase phosphorylation.	Ser/Thr Kinase	Enzyme	Inhibitor	cdc7/cdk9	845538-12-7
H	5	PZ0192	Bosutinib	530.45	4-[(2,4-Dichloro-5-methoxyphenyl)amino]-6-methoxy-7-[3-(4-methyl-1-piperazinyl)propoxy]-3-quinolinecarbonitrile; WAY-173606; SKI-606	Dual Src/Abl tyrosine kinase inhibitor with potent antiproliferative activity.	Tyrosine Kinase	Enzyme	Inhibitor	Src/Abl dual inhibitor	380843-75-4
A	6	PZ0006	Exemestane	296.4	6-Methyleneandrosta-1,4-diene-3,17-dione	Steroidal antiestrogen and irreversible aromatase inhibitor. Prevents the conversion of androgens to estrogens.	Growth Factor	Enzyme	Inhibitor	Aromatase	107868-30-4
B	6	PZ0022	BLI-489	327.29	6-[(5,6-Dihydro-8H-imidazo[2,1-c][1,4]oxazin-2-yl)methylene]-7-oxo-4-thia-1-azabicyclo[3.2.0]hept-2-ene-2-carboxylic acid sodium salt hydrate; WAY-185489	Penem class antibiotic with activity against class A, C, and D ß-lactamases.	Antibiotic	Enzyme	Inhibitor	b-lactamase	623564-40-9
C	6	PZ0112	PD-184161	557.56	5-Bromo-2-[(2-chloro-4-iodophenyl)amino]-N-(cyclopropylmethoxy)-3,4-difluoro-benzamide; UK-287074; Cefovecin; PF-3011370; PF-1529483	MEK inhibitor.	Ser/Thr Kinase	Enzyme	Inhibitor	MEK	212631-67-9
D	6	PZ0129	CP-380736	294.3	6,7-Bis(2-methoxyethoxy)-4(3H)-quinazolinone; 6,7-Bis(2-methoxyethoxy)-3,4-dihydroquinazolin-4-one; PF-00520893	Selective inhibitor of epidermal growth factor receptor.	Tyrosine Kinase	Enzyme	Inhibitor	EGFR	179688-29-0
E	6	PZ0143	PF-4708671	390.41	2-((4-(5-Ethylpyrimidin-4-yl)piperazin-1-yl)methyl)-5-(trifluoromethyl)-1H-benzo[d]imidazole	Selective p70 ribosomal S6 kinase (S6K1) inhibitor. No activity against RSK and MSK kinases.	Ser/Thr Kinase	Enzyme	Inhibitor	S6K1	1255517-76-0
F	6	PZ0159	MCOPPB	518.01	1-[1-(1-Methylcyclooctyl)-4-piperidinyl]-2-[(3R)-3-piperidinyl]-1H-benzimidazole trihydrochloride hydrate	Potent non-peptide nociceptin/orphanin FQ peptide (NOP)-receptor full agonist. Potent oral anxiolytic activity in mice.	Neurotransmitter	Receptor	Agonist	ORL1	1028969-49-4
G	6	PZ0179	Valdecoxib	314.36	4-(5-Methyl-3-phenyl-4-isoxazolyl)benzenesulfonamide	Selective inhibitor of cyclooxygenase 2 (COX2).	Lipid Signaling	Enzyme	Inhibitor	COX-2	181695-72-7
H	6	PZ0193	Axitinib	386.47	N-Methyl-2-((3-((1E)-2-(pyridin-2-yl)ethenyl)-1H-indazol-6-yl)sulfanyl)benzamide; AG-013736	Tyrosine kinase inhibitor, blocks VEGF-induced endothelial cell tube formation.	Tyrosine Kinase	Enzyme	Inhibitor	VEGFR 1, 2, 3	319460-85-0
A	7	PZ0007	Azithromycin	785.02	N-Methyl-11-aza-10-deoxo-10-dihydroerythromycin A; CP-62993	Binds 50S and 70S bacterial ribosomes, inhibits protein synthesis in bacterial cells.	Antibiotic	Enzyme	Inhibitor		117772-70-0
B	7	PZ0100	CP-154526	400.99	N-Butyl-N-ethyl-2,5-dimethyl-7-(2,4,6-trimethylphenyl)-7H-pyrrolo[2,3-d]pyrimidin-4-amine monohydrochloride	Selective, non-peptide antagonist of corticotropin releasing factor receptors (CRF1).	Neuropeptides	Receptor	Antagonist	CRF1	257639-98-8
C	7	PZ0113	PD173952	482.36	6-(2,6-Dichlorophenyl)-8-methyl-2-(4-morpholin-4-ylphenylamino)-8H-pyrido[2,3-d]pyrimidin-7-one; PD-173952	Src family kinase inhibitor.	Tyrosine Kinase	Enzyme	Inhibitor	Src	305820-75-1
D	7	PZ0130	CP-64434	734.96	N'-Desmethylazithromycin	HDAC inhibitor, anti-proliferative.	Gene Regulation	Enzyme	Inhibitor	HDAC	172617-84-4
E	7	PZ0144	PD-161989	430.43	1,4-Dihydro-6-methyl-7-nitro-5-(1-pyrrolodinemethyl)-2,3-quinoxaline 2-hydroxyethanesulfonic acid salt; PD-161989; PD-161989	AMPA receptor antagonist.	Neurotransmitter	Receptor	Antagonist	AMPA	186268-07-5
F	7	PZ0160	UK-5099	288.3	2-Cyano-3-(1-phenyl-1H-indol-3-yl)-2-propenoic acid; PF-1005023	Mitochondrial pyruvate transporter inhibitor. Blocks pyruvate-dependent O2 consumption.	Apoptosis Cell Cycle	Transporter	Inhibitor		56396-35-1
G	7	PZ0180	Delavirdine	552.67	N-[2-[[4-[3-[(1-Methylethyl)amino]-2-pyridinyl]-1-piperazinyl]carbonyl]-1H-indol-5-yl]methanesulfonamide	Non-nucleoside reverse transcriptase inhibitor (NNRTI); Anti-retroviral.	Antiviral	Enzyme	Inhibitor	Reverse transcriptase	147221-93-0
H	7	PZ0118	Nafoxidine	462.02	1-[2-[4-(3,4-dihydro-6-methoxy-2-phenyl-1-naphthalenyl)phenoxy]ethyl]-pyrrolidine hydrochloride; CP-5600; Nafoxidene hydrochloride; PNU-0011100	Derivative of Tamoxifen. Potent estrogen receptor antagonist with anti-proliferative properties.	Gene Regulation	Receptor	Antagonist	Estrogen Receptor	1847-63-8
A	8	PZ0008	Celecoxib	381.37	4-[5-(4-Methylphenyl)-3-(trifluoromethyl)-1H-pyrazol-1-yl]benzenesulfonamide; SC-58635; YM-177; CJ-016377; CP-598107; PF-00345549; PHA-00846533	COX-2 selective inhbitor with 10-20 fold selectivity over COX-1. Antiinflammatory.	Cyclooxygenase	Enzyme	Inhibitor	COX-2	169590-42-5
B	8	PZ0101	CP-226269	310.37	5-Fluoro-2-{[4-(2-pyridinyl)-1-piperazinyl]methyl}-1H-indole	Dopamine D4 receptor agonist.	Neurotransmitter	Receptor	Agonist	D4	220941-93-5
C	8	PZ0114	PD-166866	396.44	1-[2-Amino-6-(3,5-dimethoxyphenyl)-pyrido[2,3-d]pyrimidin-7-yl]-3-tert-butyl urea	Selective inhibitor of the FGF-1 receptor tyrosine kinase, no effect on c-Src, PDGFR-b, EGFR or insulin receptor.	Tyrosine Kinase	Enzyme	Inhibitor	FGFR1	192705-79-6
D	8	PZ0131	PF-998425	269.26	4-((1R,2R)-2-Hydroxycyclohexyl)-2(trifluoromethyl)benzonitrile	Nonsteroidal androgen receptor antagonist.	Growth Factor	Receptor	Antagonist	Androgen receptor	1076225-27-8
E	8	PZ0146	SC-53116	360.28	4-Amino-5-chloro-N-[[(1S,7aS)-hexahydro-1H-pyrrolizin-1-yl]methyl]-2-methoxy-benzamide; SC 49518	5-HT4 serotonin receptor partial agonist.	Neurotransmitter	Receptor	Agonist	5-HT4	141196-99-8
F	8	PZ0162	PD 0325901	482.19	N-[(2R)-2,3-Dihydroxypropoxy]-3,4-difluoro-2-[(2-fluoro-4-iodophenyl)amino]-benzamide	Potent MKK1 (MEK1) and MKK2 (MEK2) inhibitor. Inactive against a panel of 27 other kinases.	Ser/Thr Kinase	Enzyme	Inhibitor	MKK1 / MKK2	391210-10-9
G	8	PZ0181	PD184352	478.66	2-(2-Chloro-4-iodophenylamino)-N-cyclopropylmethoxy-3,4-difluorobenzamide; CI-1040	Highly selective non-competitive inhibitor of MEK (MKK1). Suppresses the ERK pathway.	Ser/Thr Kinase	Enzyme	Inhibitor	MEK	212631-79-3
H	8	PZ0137	CP-471474	368.38	2-[[[4-(4-Fluorophenoxy)phenyl]sulfonyl]amino]-N-hydrox y-2-methylpropanamide; PF-1626077	Broad spectrum inhibitor of matrix metalloproteinases, prevents left ventricular remodeling.	Metalloproteinase	Enzyme	Inhibitor	MMP	210755-45-6
A	9	PZ0009	Tolterodine	475.57	2-[(1R)-3-[Bis(1-methylethyl)amino]-1-phenylpropyl]-4-methyl-phenol tartrate; PNU-200583E; Detrusitol	Bladder-specific muscarinic cholinergic receptor antagonist.	Neurotransmitter	Receptor	Antagonist	CHRM3	124937-51-5
B	9	PZ0102	CP-93129	288.17	1,4-Dihydro-3-(1,2,3,6-tetrahydro-4-pyridinyl)-5H-pyrrol[3,2-b]pyridin-5-one	Potent and selective 5-HT1B agonist.	Neurotransmitter	Receptor	Agonist	5-HT1B	127792-75
C	9	PZ0115	CP-31398	435.39	N'-[2-[2-(4-Methoxyphenyl)ethenyl]-4-quinazolinyl]-N,N-dimethyl-1,3-propanediamine	p53 stabilizer; apoptosis inducer.	Apoptosis Cell Cycle	Tumor suppressor	Stabilizer	p53	259199-65-0
D	9	PZ0132	SC-51322	457.93	8-Chloro-dibenz[b,f][1,4]oxazepine-10(11H)-carboxylic acid 2-[3-[(2-furanylmethyl)thio]-1-oxopropyl]hydrazide	Selective EP1 prostanoid receptor antagonist.	Lipid Signaling	Receptor	Antagonist	EP2	146032-79-3
E	9	PZ0147	PHA-665752	641.61	(3Z)-5-[[(2,6-Dichlorophenyl)methyl]sulfonyl]-3-[[3,5-dimethyl-4-[[(2R)-2-(1-pyrrolidinylmethyl)-1-pyrrolidinyl]carbonyl]-1H-pyrrol-2-yl]methylene]-1,3-dihydro-2H-indol-2-one	ATP-competitive, active-site c-Met inhibitor.	Tyrosine Kinase	Enzyme	Inhibitor	c-MET / ALK	477575-56-7
F	9	PZ0170	Torcetrapib	600.47	(2R,4S)-4-((3,5-Bis-trifluoromethylbenzyl)methoxycarbonylamino)-2-ethyl-6-trifluoromethyl-3,4-dihydro-2H-quinoline-1-carboxylic acid ethyl ester; CP-529,414; CP-529414	Cholesteryl ester transfer protein (CETP) inhibitor. Raises HDL levels.	Lipid Signaling	Transporter	Inhibitor	CTEP	262352-17-0
G	9	PZ0182	Pactamycin	558.62	2-Hydroxy-6-methylbenzoic acid [(1S,2R,3R,4S,5S)-5-[(3-acetylphenyl)amino]-4-amino-3-[[(dimethylamino)carbonyl]amino]-1,2-dihydroxy-3-[(1S)-1-hydroxyethyl]-2-methylcyclopentyl]methyl ester; U-15800; PNU-0015800	Protein synthesis inhibitor in Gram negative and positive bactieria. Broad antitumor, antiviral, and antiplasmodial activity.	Antibiotic	Enzyme	Inhibitor		23668-11-3
H	9	PZ0150	SU5614	272.73	(3Z)-5-Chloro-3-[(3,5-dimethyl-1H-pyrrol-2-yl)methylene]-1,3-dihydro-2H-indol-2-one	Inhibitor of FMS-like tyrosine kinase 3 (FLT3), VEGF and PDGF receptor tyrosine kinases.	Tyrosine Kinase	Enzyme	Inhibitor	FLT3	1055412-47-9
A	10	PZ0011	Eletriptan	462.42	3-[[(2R)-1-Methyl-2-pyrrolidinyl]methyl]-5-[2-(phenylsulfonyl)ethyl]-1H-indole hydrobromide	Serotonin 5-HT1B/1D receptor agonist; second generation anti-migraine drug.	Neurotransmitter	Receptor	Agonist	5-HT1B/1D	17783-49-2
B	10	PZ0103	CP-346086	513.51	4'-Trifluoromethyl-biphenyl-2-carboxylic acid [2-(2H-[1,2,4]triazol-3-ylmethyl)-1,2,3,4-tetrahydro-isoquinolin-6-yl]amide	Microsomal triglyceride transfer protein inhibitor.	Lipid Signaling	Transporter	Inhibitor	MTP, MTTP	186390-48-7
C	10	PZ0116	PD-166285	585.35	6-(2,6-Dichlorophenyl)-2-[[4-[2-(diethylamino)ethoxy]phenyl]amino]-8-methyl-pyrido[2,3-d]pyrimidin-7(8H)-one	Broad spectrum protein tyrosine kinase inhibitor.	Tyrosine Kinase	Enzyme	Inhibitor	Src, FGFR	212391-63-4
D	10	PZ0135	PHA-543613	271.31	N-[(3R)-1-Azabicyclo[2.2.2]oct-3-yl]furo[2,3-c]pyridine-5-carboxamide	Potent selective acetylcholine receptor (a7 nAChR) agonist.	Tyrosine Kinase	Receptor	Agonist	nAChRa7	478149-53-0
E	10	PZ0148	CP-802079	444.93	({3-(4-Chlorophenyl)-3-[4-(thiazole-carbonyl)-phenoxy]-propyl}-methyl-amino)-acetic acid; N-[3-(4-Chlorophenyl)-3-[4-(2-thiazolylcarbonyl)phenoxy]propyl]-N-methyl-glycine	Selective glycine transporter type 1 antagonist, increases the amplitude of the NMDAR currents.	Neurotransmitter	Transporter	Antagonist	GlyT1	736175-49-8
F	10	PZ0171	CP-100356	597.1	4-(3,4-Dihydro-6,7-dimethoxy-2(1H)-isoquinolinyl)-N-[2-(3,4-dimethoxyphenyl)ethyl]-6,7-dimethoxy-2-quinazolinamine monohydrochloride	Potent inhibitor of the ABC transporter MDR1 (P-Gp).	Multi drug resistance	Transporter	Inhibitor	MDR1	142715-48-8
G	10	PZ0183	ERB-041	271.24	2-(3-Fluoro-4-hydroxyphenyl)-7-vinyl-1,3-benzoxazol-5-ol; WAY-202041; Prinaberel	Potent, selective ERß receptor agonist, 200-fold selective over ERa.	Gene Regulation	Receptor	Agonist	Estrogen Receptor	524684-52-4
H	10	PZ0173	CP-775146	423.54	(S)-2-(3-(1-(2-(4-isopropylphenyl)acetyl)piperidin-3-yl)phenoxy)-2-methylpropanoic acid	Potent and selective PPARa agonist.	Lipid Signaling	Receptor	Agonist	PPARa	702680-17-9
A	11	PZ0012	Sunitinib	532.56	N-[2-(Diethylamino)ethyl]-5-[(Z)-(5-fluoro-1,2-dihydro-2-oxo-3H-indol-3-ylidene)methyl]-2,4-dimethyl-1H-pyrrole-3-carboxamide (2S)-2-hydroxybutanedioic acid (1:1) salt; SU 01124	Receptor tyrosine kinase inhibitor (RTKi), activity against VEGF-R1, VEGF-R2, VEGF-R3, PDGF-Ra, PDGF-Rß, KIT, FLT3, CSF-1R, and RET.	Tyrosine Kinase	Enzyme	Inhibitor	RTKs	341031-54-7
B	11	PZ0104	CP-91149	399.87	5-Chloro-N-[(1S,2R)-3-(dimethylamino)-2-hydroxy-3-oxo-1-(phenylmethyl)propyl]-1H-indole-2-carboxamide	Selective glycogen phosphorylase inhibitor.	Phosphorylase	Enzyme	Inhibitor	glycogen phosphorylase	186392-40-5
C	11	PZ0117	PF-573228	491.49	6-[4-(3-Methanesulfonyl-benzylamino)-5-trifluoromethyl-pyrimidin-2-ylamino]-3,4-dihydro-1H-quinolin-2-one; PF-228	Focal adhesion kinase (FAK) inhibitor.	Tyrosine Kinase	Enzyme	Inhibitor	FAK	869288-64-2
D	11	PZ0136	CP-100263	369.33	(2R,3R)-N-[(2-Methoxyphenyl)methyl]-2-phenyl-3-piperidinamine dihydrochloride hydrate; (-)-CP 99994	Neurokinin receptor antagonist.	Neuropeptides	Receptor	Antagonist	NK-1	136982-37-1
E	11	PZ0149	CP-868388	439.54	(S)-2-(3-(1-((4-Isopropylbenzyloxy)carbonyl)piperidin-3-yl)phenoxy)-2-methylpropanoic acid	Potent PPARa agonist.	Lipid Signaling	Receptor	Agonist	PPARa	702681-67-2
F	11	PZ0172	Gisadenafil	677.79	5-[2-Ethoxy-5-[(4-ethyl-1-piperazinyl)sulfonyl]-3-pyridinyl]-3-ethyl-2,6-dihydro-2-(2-methoxyethyl)-7H-pyrazolo[4,3-d]pyrimidin-7-one benzenesulfonate; UK 369003; UK 369003-26	PDE5 inhibitor, 80 fold selectivity over PDE6, and greater than 3000 fold selective over PDEs 1-4 and 7.	Cyclic nucleotides	Enzyme	Inhibitor	PDE5	334827-98-4
G	11	PZ0185	PF-431396	506.5	N-[2-[[[2-[(2,3-dihydro-2-oxo-1H-indol-5-yl)amino]-5-(trifluoromethyl)-4-pyrimidinyl]amino]methyl]phenyl]-N-methyl-Methanesulfonamide	Potent inhibitor of PYK2 and FAK kinases. Attenuates bone loss in OVX mice.	Tyrosine Kinase	Enzyme	Inhibitor	PYK2/FAK	717906-29-1
H	11	PZ0186	PF-477736	419.48	(2R)-2-Amino-2-cyclohexyl-N-[2-(1-methyl-1H-pyrazol-4-yl)-6-oxo-5,6-dihydro-1H-[1,2]diazepino[4,5,6-cd]indol-8-yl]-acetamide; PF-00477736	Selective ATP-competitive inhibitor of Checkpoint kinase 1 (Chk1). Abrogates cell cycle arrest induced by DNA damage.	Ser/Thr Kinase	Enzyme	Inhibitor	Chk1	952021-60-2
A	12	PZ0013	Nelfinavir	663.89	3S,4aS,8aS)-N-(1,1-Dimethylethyl)decahydro-2-[(2R,3R)-2-hydroxy-3-[(3-hydroxy-2-methylbenzoyl)amino]-4-(phenylthio)butyl]-3-isoquinolinecarboxamide; AG-1343	HIV protease inhibitor; antiretroviral; and anti-tumor agent.	Antiviral	Enzyme	Inhibitor	Protease	159989-64-7
B	12	PZ0106	SC-236	401.79	4-[5-(4-Chlorophenyl)-3-(trifluoromethyl)-1H-pyrazol-1-yl]-benzenesulfonamide	Selective inhibitor of cyclooxygenase 2 (COX2).	Lipid Signaling	Enzyme	Inhibitor	COX-2	170569-86-5

## Sheet: Tabelle1
Atorvastatin	SC-26196	MCOPPB	PHA-665752
Linezolid	Avasimibe	Valdecoxib	Torcetrapib
CP-101537	Varenicline	Axitinib	Pactamycin
CP-135807	Temsirolimus	Azithromycin	SU5614
SC-51089 hydrate	SC-57461A	CP-154526	Eletriptan
PF-956980	CP-53631	PD173952	CP-346086
Sonepiprazole	PD-156707	CP-64434	PD-166285
GSI-953	UK-383367	PD-161989	PHA-543613
Maraviroc	OSU6162	UK-5099	CP-802079
Trovafloxacin	Crizotinib	Delavirdine	CP-100356
CP-335963	Voriconazole	Nafoxidine	ERB-041
Avridine	Tigecycline	Celecoxib	CP-775146				s
SC-58125	PD-407824	CP-226269	Sunitinib
UK-356618	CP-74416	PD-166866	CP-91149
PD-149163	PD-180970	PF-998425	PF-573228
CP-316819	PF-3845	SC-53116	CP-100263
Sildenafil	PHA 767491	PD 0325901	CP-868388
Dofetilide	Bosutinib	PD184352	Gisadenafil
PD-161570	Exemestane	CP-471474	PF-431396
CP-66713	BLI-489	Tolterodine	PF-477736
EBPC	PD-184161	CP-93129	Nelfinavir
PF-03716556	CP-380736	CP-31398	SC-236
	PF-4708671	SC-51322
